# Supplementary material for: Comparison of the Modified TyG Indices and Other Parameters to Predict Non-Alcoholic Fatty Liver Disease in Youth
Source: MDPI journal article supplement (doi:10.3390/biology11050685), 2022-04-29
Supplement: s1 [file s1]

## SUPPLEMENTARY DATA

# Comparison of the Modified TyG Indices and Other Parameters to Predict Non-Alcoholic Fatty Liver Disease in Youth

Kyungchul Song <sup>1</sup>, Hae Won Lee <sup>1</sup>, Han Saem Choi <sup>2</sup>, Goeun Park <sup>3</sup>, Hye Sun Lee <sup>3</sup>, Su Jin Kim <sup>1</sup>, Myeongseob Lee <sup>1</sup>, Junghwan Suh <sup>1</sup>, Ahreum Kwon <sup>1</sup>, Ho-Seong Kim <sup>1</sup> and Hyun Wook Chae <sup>1,\*</sup>

<sup>1</sup>Department of Pediatrics, Severance Children's Hospital, Endocrine Research Institute, Yonsei University College of Medicine, Seoul, Korea

<sup>2</sup>Department of Pediatrics, Catholic Kwandong University, International St. Mary's Hospital, Incheon, South Korea

<sup>3</sup>Biostatistics Collaboration Unit, Yonsei University College of Medicine, Seoul, Korea

**Corresponding author:** Hyun Wook Chae

Department of Pediatrics, Severance Children's Hospital, Endocrine Research Institute, Yonsei University College of Medicine, 50-1 Yonsei-ro, Seodaemun-gu, Seoul 03722, Korea; E-mail: hopechae@yuhs.ac, Tel: +82-2-2019-3350, Fax: +82-2-393-9118

**Table S1. Supplemental characteristics of the participants according to NAFLD**

| Characteristics                | Total ( <i>n</i> = 258) | Normal ( <i>n</i> = 229) | NAFLD ( <i>n</i> = 29) | <i>p</i> |
|--------------------------------|-------------------------|--------------------------|------------------------|----------|
| Height, cm                     | 168.66 ± 8.44           | 168.06 ± 8.27            | 173.4 ± 8.42           | 0.001    |
| Weight, kg                     | 63.1 ± 15.01            | 60.25 ± 11.46            | 85.56 ± 20.27          | < 0.001  |
| Platelet, ×10 <sup>3</sup> /μL | 272.23 ± 47.47          | 271.35 ± 47.83           | 279.17 ± 44.63         | 0.404    |
| Albumin, g/dL                  | 4.8 ± 0.25              | 4.79 ± 0.25              | 4.84 ± 0.26            | 0.351    |
| Total Bilirubin, mg/dL         | 0.9 ± 0.41              | 0.9 ± 0.42               | 0.84 ± 0.36            | 0.459    |
| ALP, IU/L                      | 82.22 ± 32.2            | 80.97 ± 31.45            | 92.03 ± 36.8           | 0.081    |
| γ-GT, IU/L                     | 17.09 ± 10.26           | 15.44 ± 7.09             | 30.14 ± 18.9           | < 0.001  |
| TC, mg/dL                      | 167.43 ± 27.13          | 166.3 ± 27.44            | 176.31 ± 23.1          | 0.061    |
| TG, mg/dL                      | 92.16 ± 55.36           | 86.01 ± 47.73            | 140.69 ± 82.61         | 0.002    |
| HDL-C, mg/dL                   | 54.54 ± 11.22           | 55.61 ± 10.95            | 46.07 ± 9.85           | < 0.001  |
| LDL-C, mg/dL                   | 94.44 ± 24.45           | 93.48 ± 24.86            | 102.03 ± 19.74         | 0.076    |
| Non-HDL-C, mg/dL               | 112.89 ± 25.87          | 110.69 ± 25.34           | 130.24 ± 23.71         | < 0.001  |

Continuous variables are presented mean ± standard deviation and categorical variables as number (percentages). *p* value is assessed using independent t-test for continuous variables and Chi-square test for categorical variables. NAFLD: Non-alcoholic fatty liver disease; ALP: alkaline phosphatase; γ-GT: Gamma-glutamyl transferase; TC: total cholesterol; TG: triglycerides; HDL-C: high-density lipoprotein cholesterol; LDL-C: low-density lipoprotein cholesterol.

**Figure S1. APRI, modified APRI, FIB-4, and HSI according to the NAFLD grade**

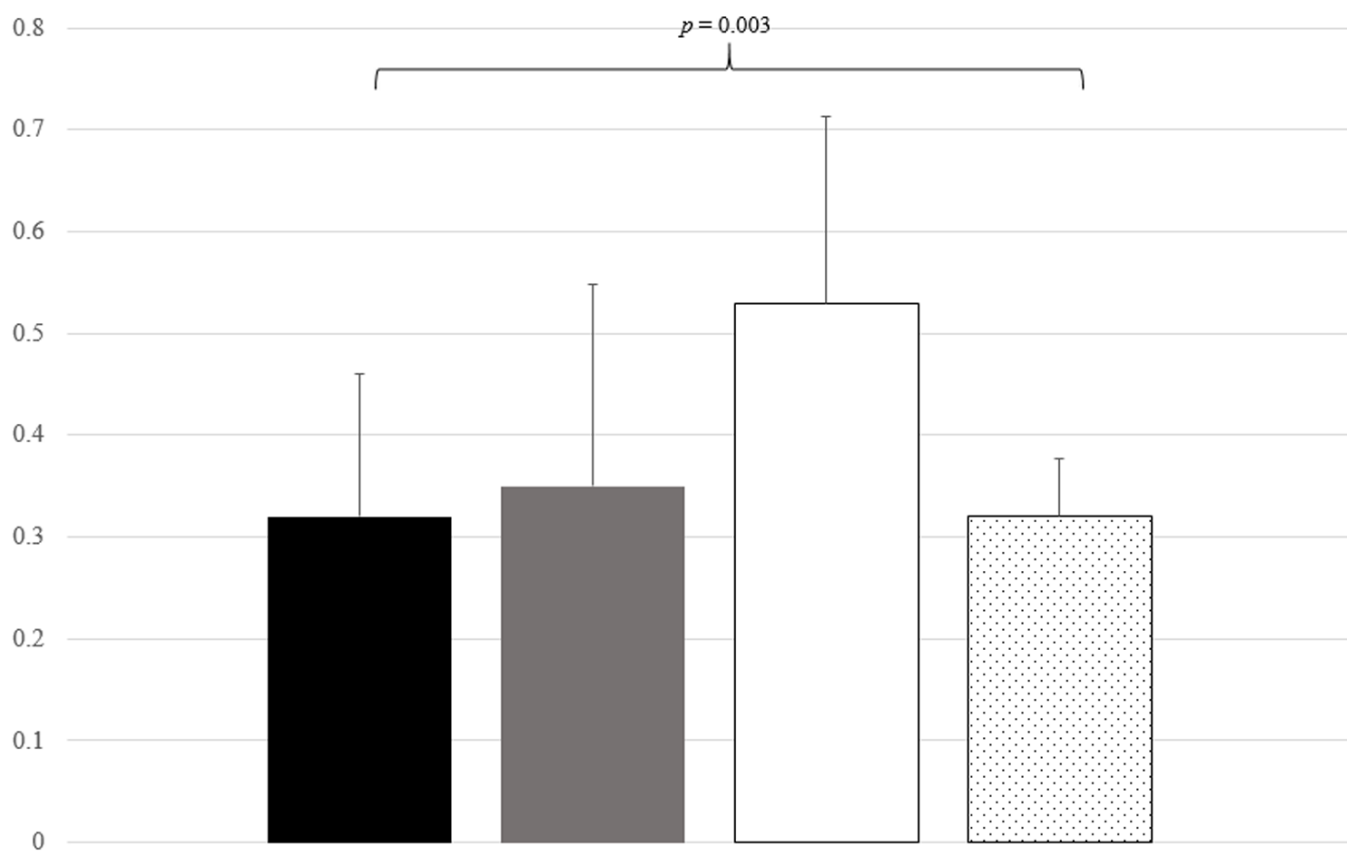

(a)

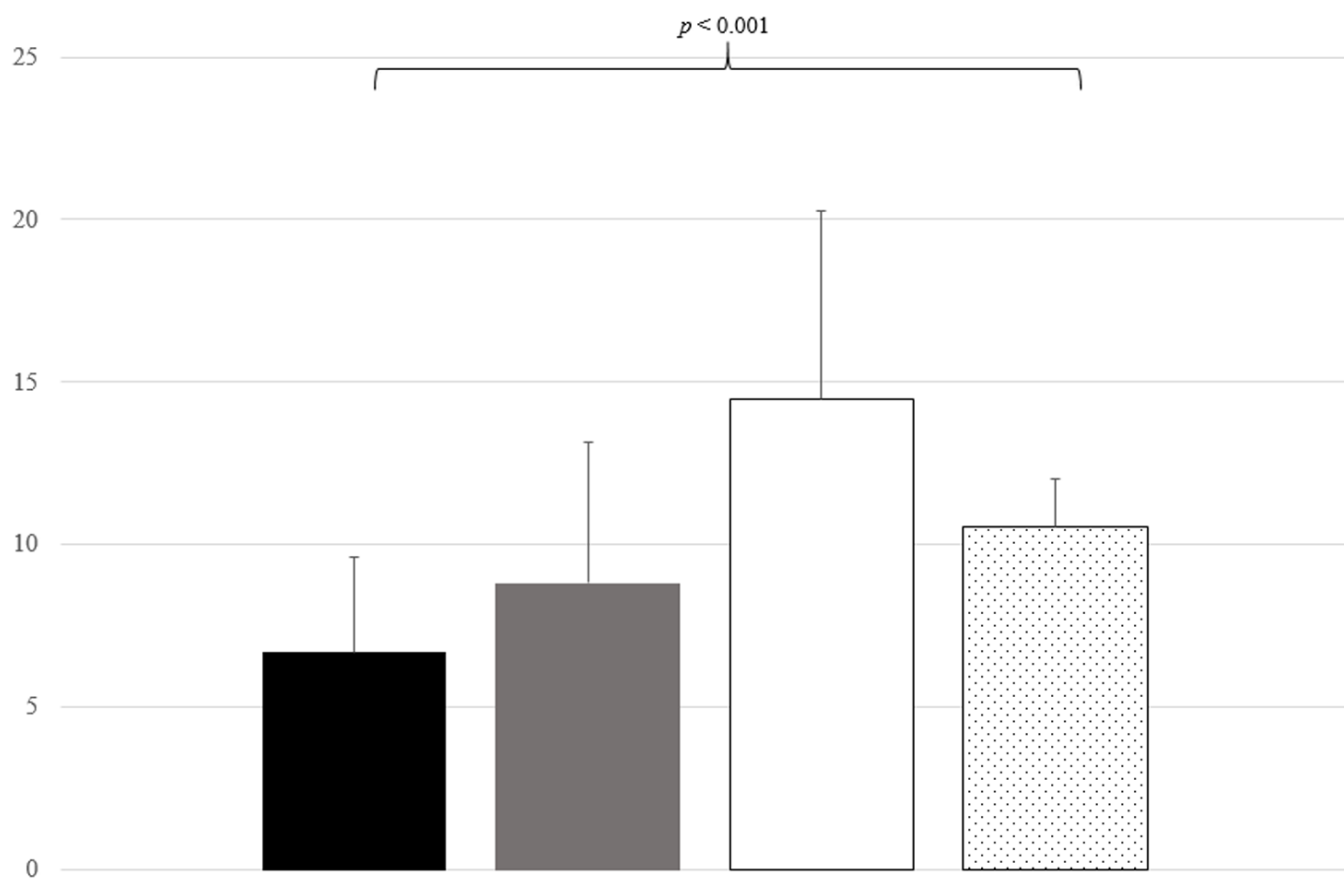

(b)

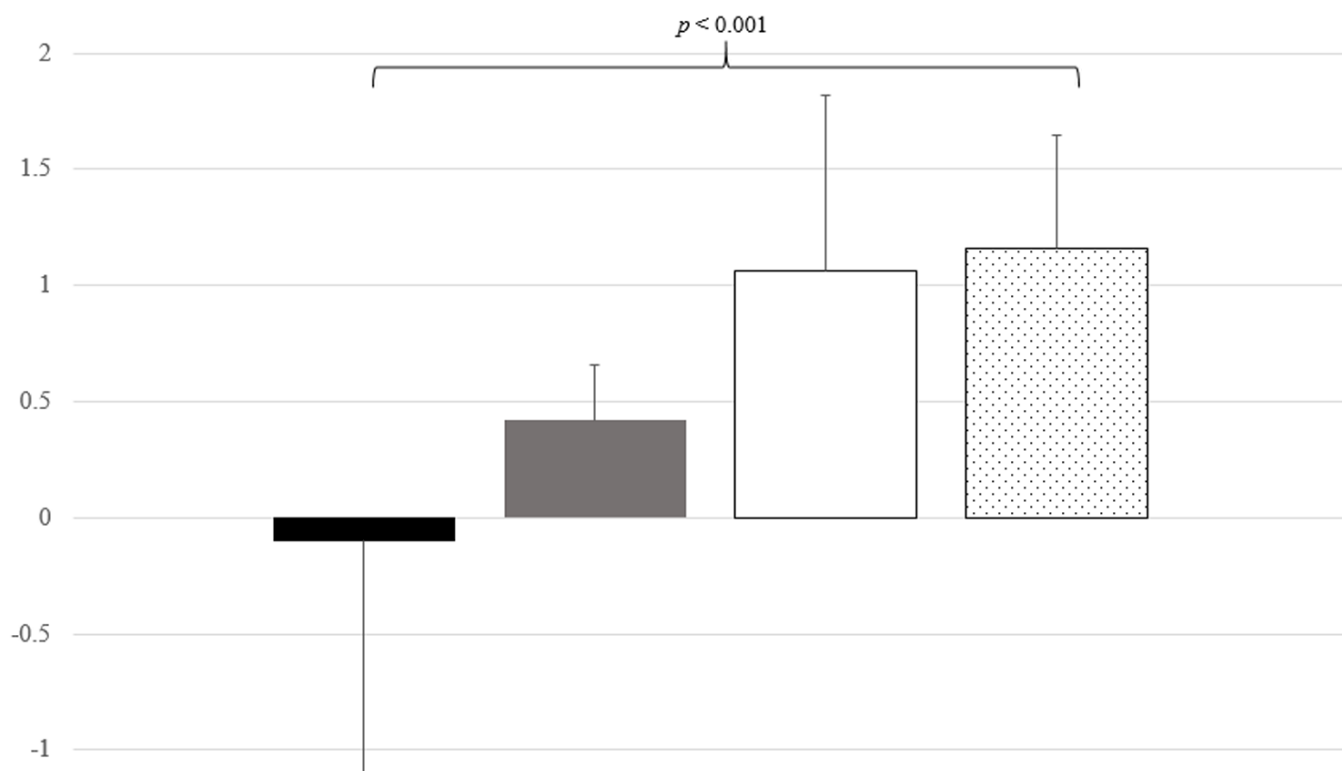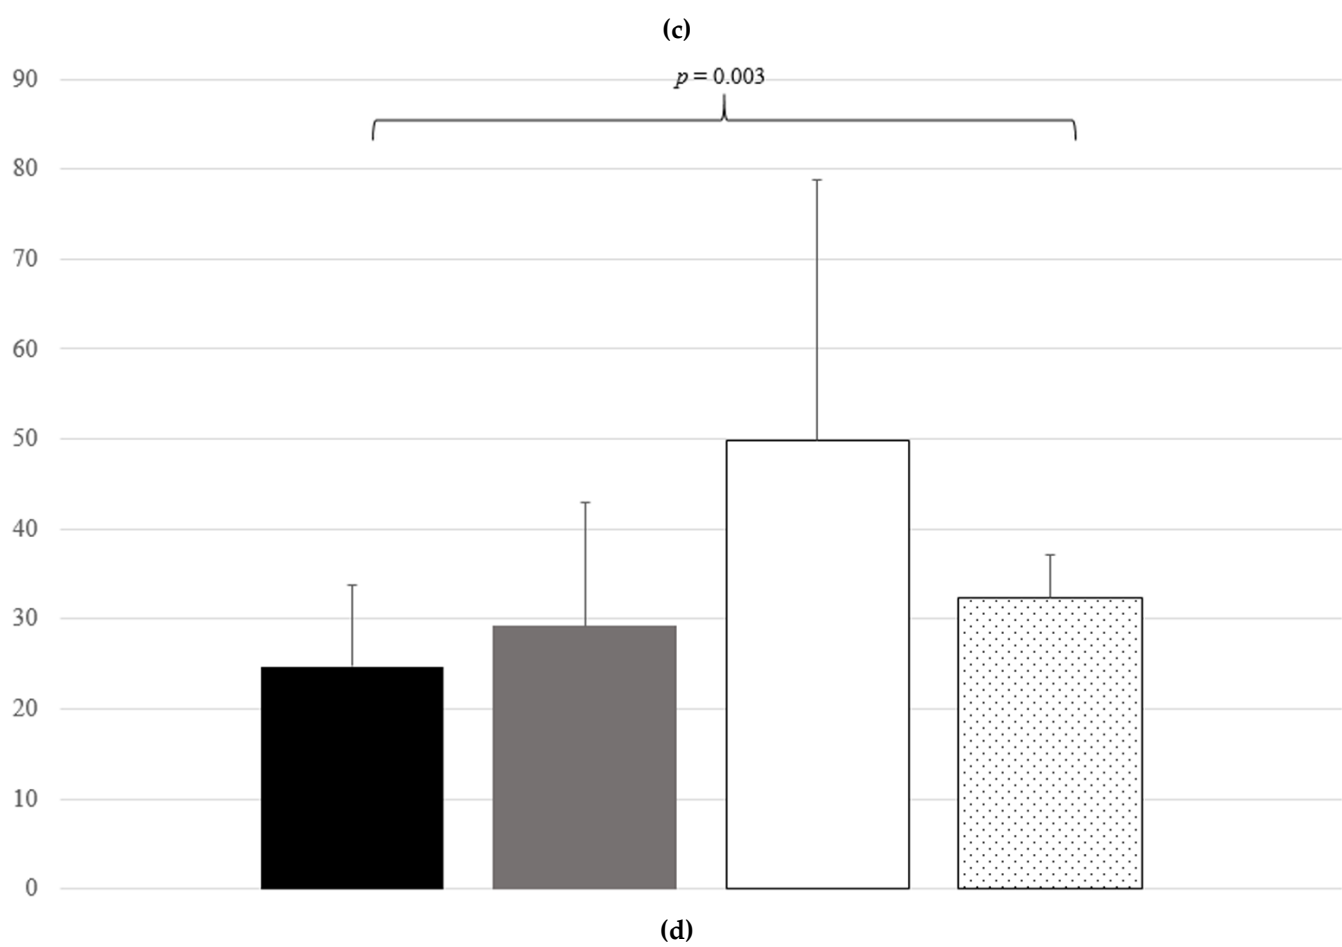

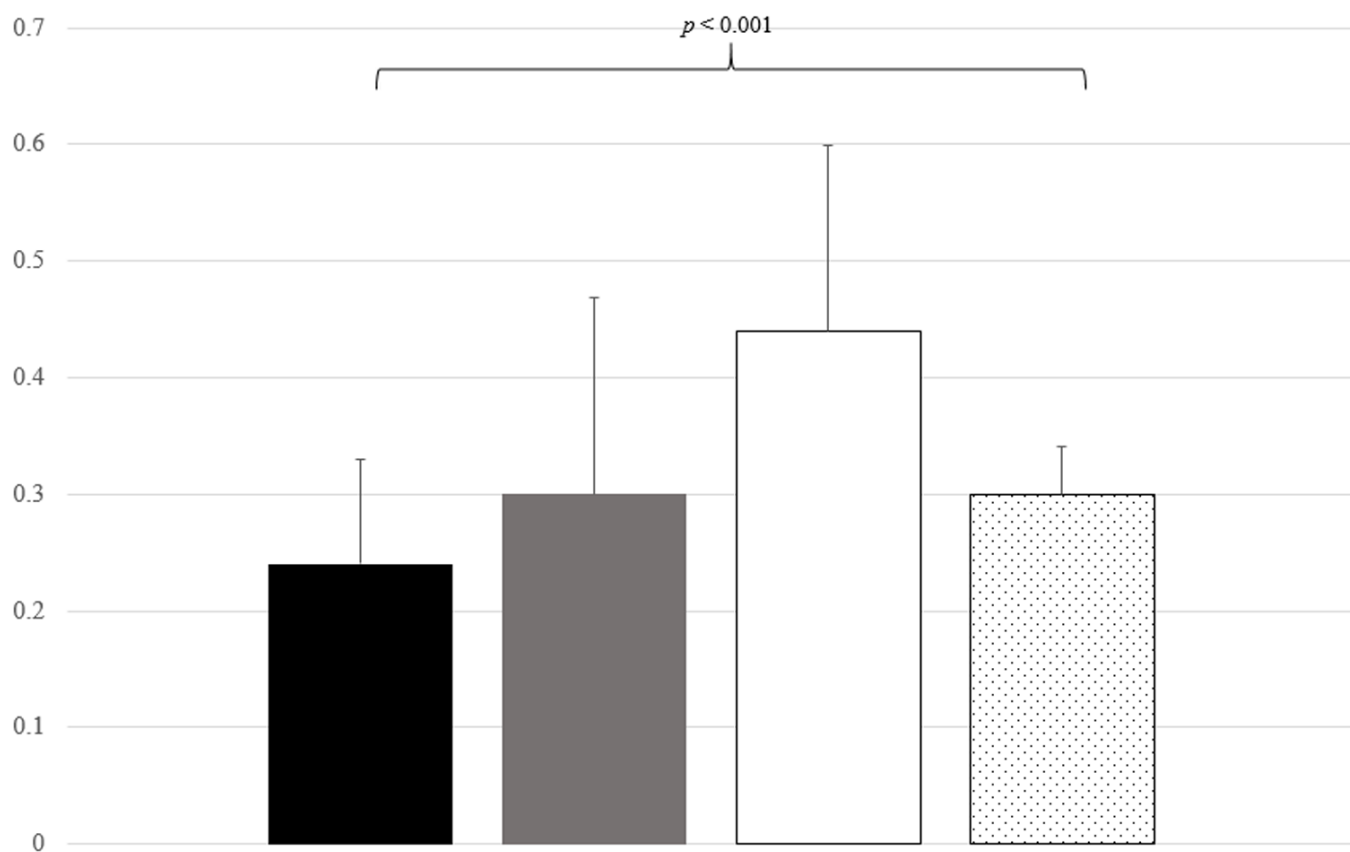

(e)

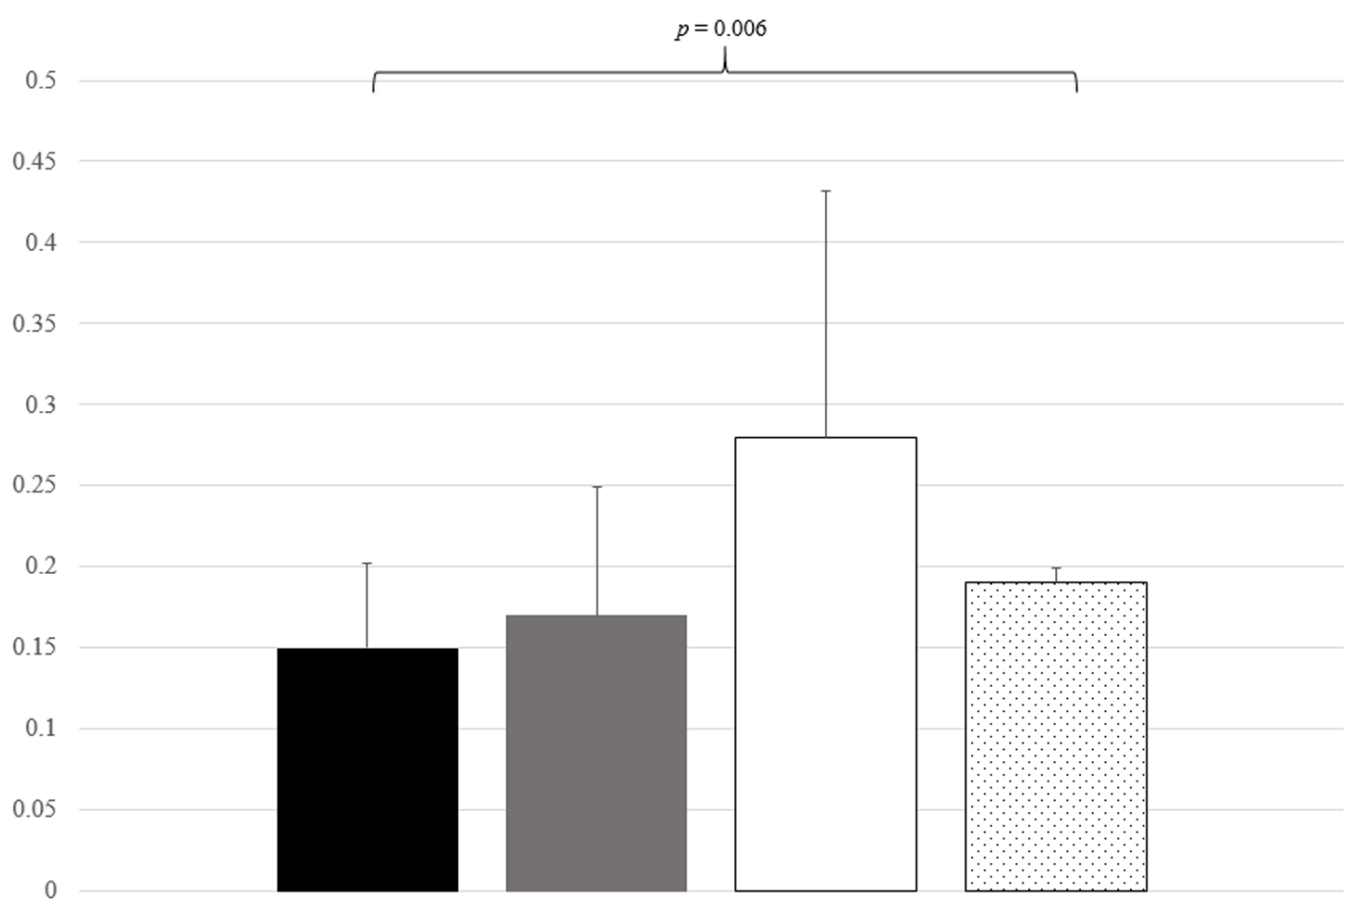

(f)

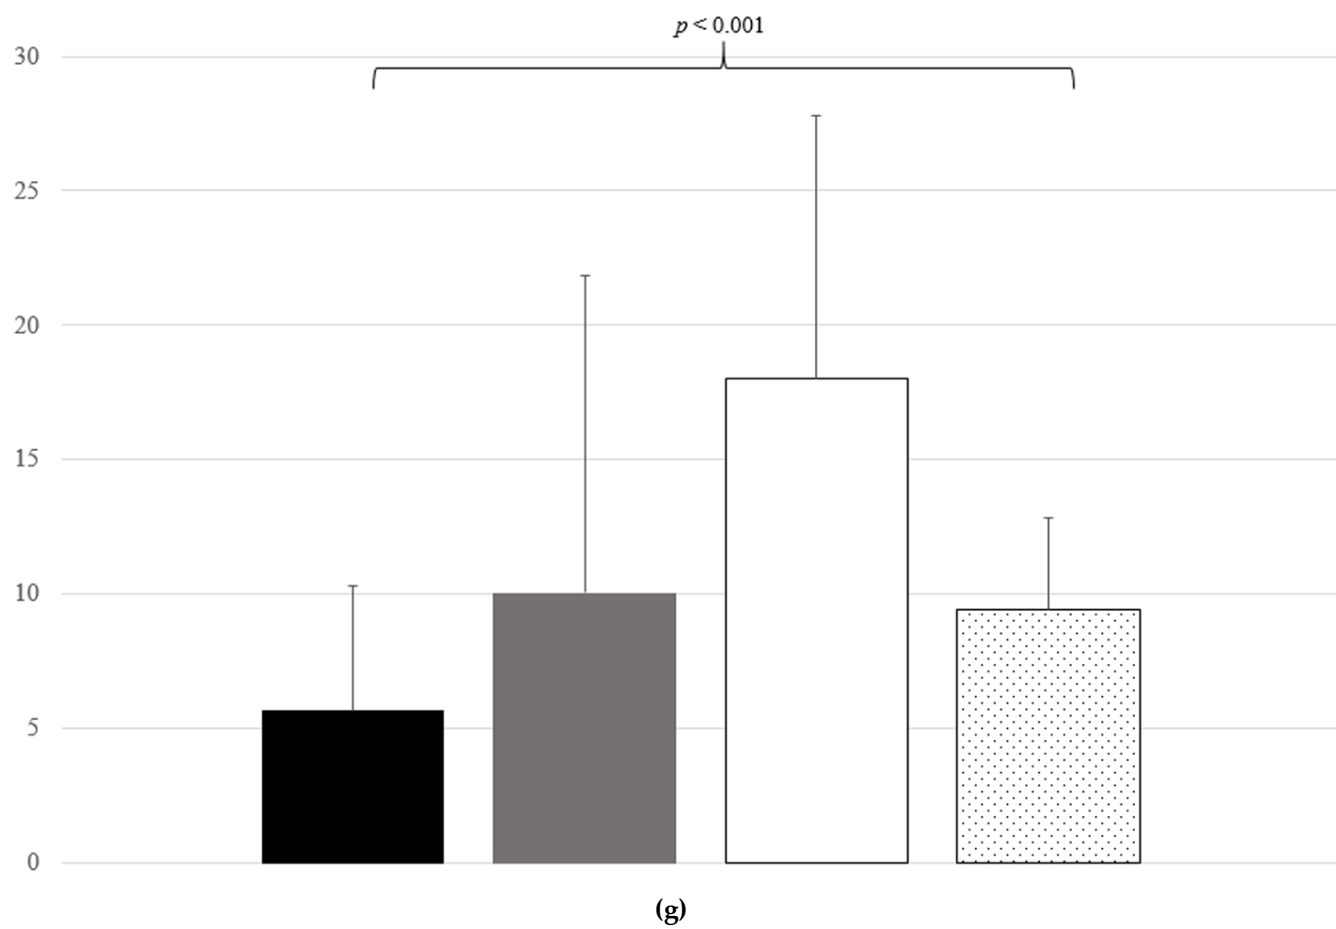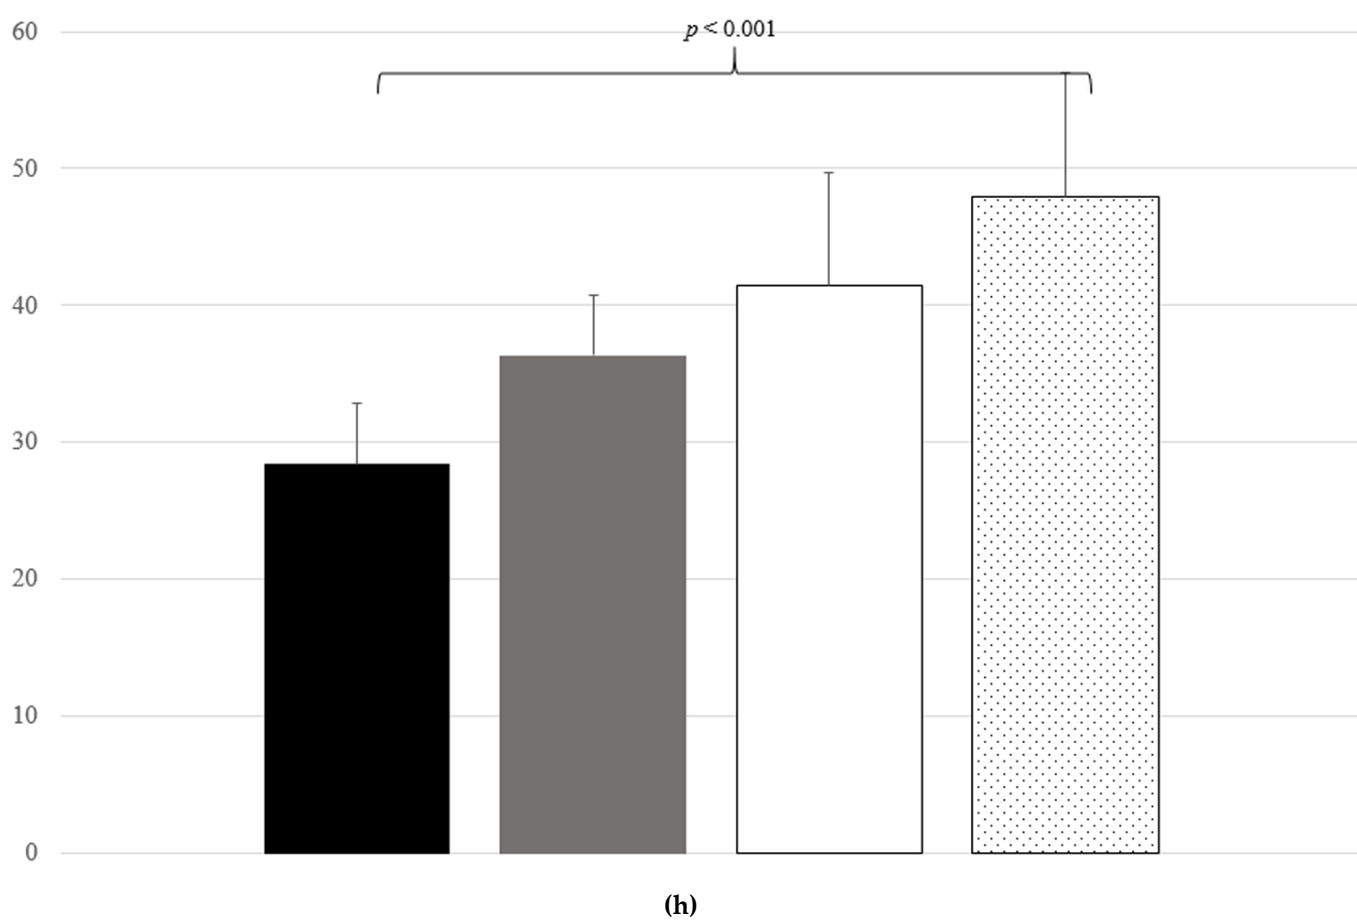

The black bar is the NAFLD grade group, the gray bar is the NAFLD grade 1 group, the white bar is the NAFLD grade 2 group, and the bar with dot pattern is the NAFLD grade 3 group. The number on the bar is the p-value of analysis of variance. **(a)** APRI index according to the NAFLD grade; **(b)** APRI-BMI according to the NAFLD grade; **(c)** APRI-BMI SDS according to the NAFLD grade; **(d)** APRI-WC according to the NAFLD grade; **(e)** APRI-WHR according to the NAFLD grade; **(f)** APRI-WHtR according to the NAFLD grade; **(g)** FIB-4 according to the NAFLD grade; **(h)** HSI according to the NAFLD grade; APRI: aspartate aminotransferase to platelet index; FIB-4: fibrosis-4 index; HSI: hepatic steatosis index; NAFLD: non-alcoholic fatty liver disease; BMI: body mass index; SDS: standard deviation score; WC: waist circumference; WHR: waist-to-hip ratio; WHtR: waist-to-height ratio.

**Table S2.** Comparison of areas under receiver operating curves among each parameter for predicting NAFLD

| Parameter       | TyG       | TyG-BMI   | TyG-BMI<br>SDS | TyG-WC    | TyG-<br>WHR | TyG-<br>WHtR | APRI      | APRI-<br>BMI | APRI-<br>BMI SDS | APRI-WC   | APRI-<br>WHR | APRI-<br>WHtR | FIB-4     | HSI       |
|-----------------|-----------|-----------|----------------|-----------|-------------|--------------|-----------|--------------|------------------|-----------|--------------|---------------|-----------|-----------|
| TyG             | reference | < 0.001   | 0.003          | < 0.001   | < 0.001     | < 0.001      | 0.008     | 0.833        | 0.002            | 0.391     | 0.442        | 0.298         | 0.676     | < 0.001   |
| TyG-BMI         | < 0.001   | reference | 0.157          | 0.068     | 0.261       | 0.824        | < 0.001   | < 0.001      | 0.173            | 0.001     | < 0.001      | 0.002         | < 0.001   | 0.359     |
| TyG-BMI<br>SDS  | 0.003     | 0.157     | reference      | 0.007     | > 0.999     | 0.337        | < 0.001   | < 0.001      | 0.824            | 0.002     | < 0.001      | < 0.001       | < 0.001   | 0.739     |
| TyG-WC          | < 0.001   | 0.068     | 0.007          | reference | 0.041       | 0.141        | < 0.001   | < 0.001      | 0.011            | < 0.001   | < 0.001      | < 0.001       | < 0.001   | 0.056     |
| TyG-WHR         | < 0.001   | 0.261     | > 0.999        | 0.041     | reference   | 0.439        | < 0.001   | < 0.001      | 0.886            | 0.003     | < 0.001      | 0.003         | < 0.001   | 0.726     |
| TyG-WHtR        | < 0.001   | 0.824     | 0.337          | 0.141     | 0.439       | reference    | < 0.001   | < 0.001      | 0.379            | < 0.001   | < 0.001      | < 0.001       | < 0.001   | 0.549     |
| APRI            | 0.008     | < 0.001   | < 0.001        | < 0.001   | < 0.001     | < 0.001      | Reference | < 0.001      | < 0.001          | 0.178     | < 0.001      | 0.317         | < 0.001   | < 0.001   |
| APRI-BMI        | 0.833     | < 0.001   | < 0.001        | < 0.001   | < 0.001     | < 0.001      | < 0.001   | reference    | < 0.001          | 0.216     | 0.004        | 0.162         | 0.174     | < 0.001   |
| APRI-BMI<br>SDS | 0.002     | 0.173     | 0.824          | 0.011     | 0.886       | 0.379        | < 0.001   | < 0.001      | reference        | 0.001     | < 0.001      | 0.001         | < 0.001   | 0.814     |
| APRI-WC         | 0.391     | < 0.0001  | 0.002          | < 0.001   | 0.003       | < 0.001      | 0.178     | 0.216        | 0.001            | reference | 0.739        | 0.317         | 0.518     | 0.002     |
| APRI-<br>WHR    | 0.442     | < 0.001   | < 0.001        | < 0.001   | < 0.001     | < 0.001      | < 0.001   | 0.004        | < 0.001          | 0.739     | reference    | 0.562         | 0.378     | < 0.001   |
| APRI-<br>WHtR   | 0.298     | 0.002     | < 0.001        | < 0.001   | 0.003       | < 0.001      | 0.317     | 0.162        | 0.001            | 0.317     | 0.562        | reference     | 0.403     | 0.002     |
| FIB-4           | 0.676     | < 0.001   | < 0.001        | < 0.001   | < 0.001     | < 0.001      | < 0.001   | 0.174        | < 0.001          | 0.518     | 0.378        | 0.403         | reference | < 0.001   |
| HSI             | < 0.001   | 0.359     | 0.739          | 0.056     | 0.726       | 0.549        | < 0.001   | < 0.001      | 0.814            | 0.002     | < 0.001      | 0.002         | < 0.001   | reference |

Note: Bootstrap method was used to perform pairwise comparisons between AUCs for the parameters. Values are presented as *p* values. NAFLD: Non-alcoholic fatty liver disease; TyG: triglyceride glucose index; BMI: body mass index; SDS: standard deviation score; WC: waist circumference; WHR: waist-to-hip ratio; WHtR: waist-to-height ratio; APRI: aspartate aminotransferase to Platelet index; FIB: Fibrosis-4 index; HSI: hepatic steatosis index.
